# Supplementary material for: The SMAC mimetic LCL-161 selectively targets JAK2V617F mutant cells
Source: Springer Nature journal article supplement (doi:10.1186/s40164-019-0157-6), 2020-01-02

### LCL +/- QNZ

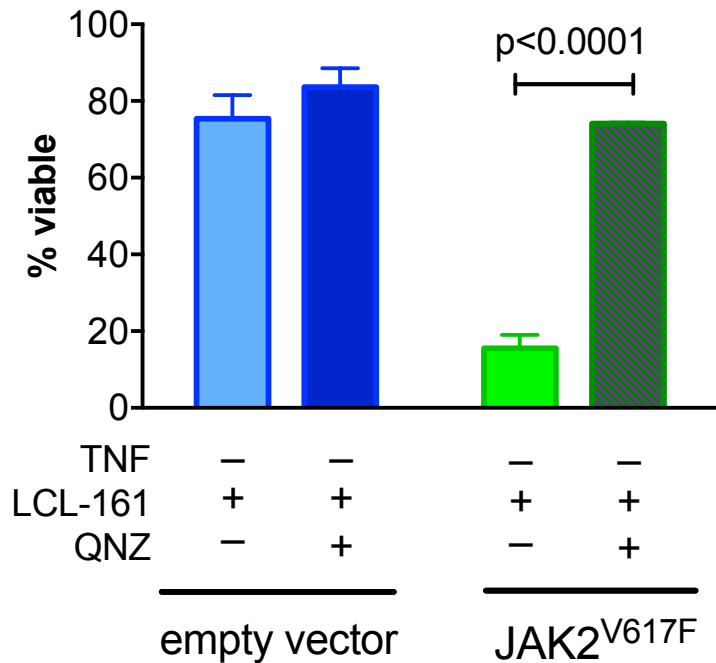

### LCL + TNF +/- QNZ

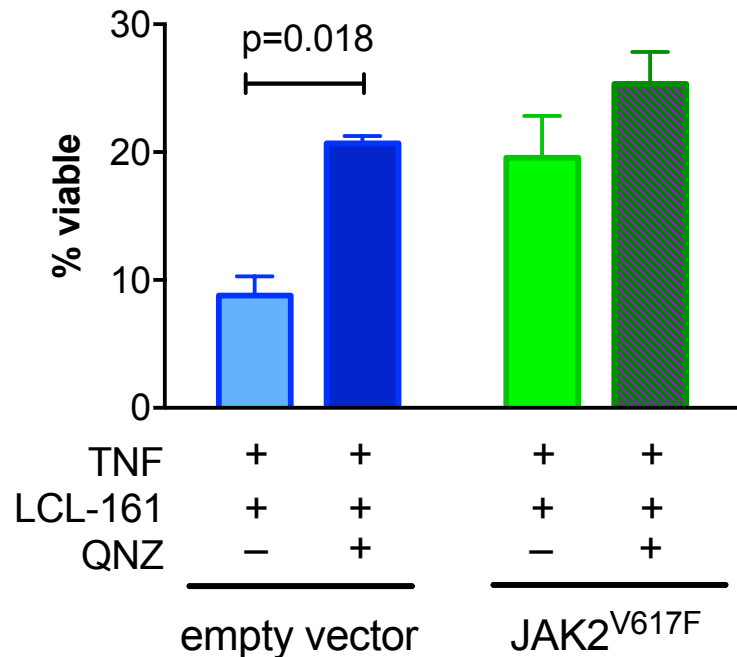

Supplement: MOESM1 [file 17662018]
