# Supplementary material for: The SMAC mimetic LCL-161 selectively targets JAK2V617F mutant cells
Source: Springer Nature journal article supplement (doi:10.1186/s40164-019-0157-6), 2020-01-02

**K562 (BCR-ABL)**

**HEL (JAK2<sup>V617F</sup>)**

LCL-161

—

+

—

+

cIAP1

cIAP2

XIAP

$\beta$ -Actin

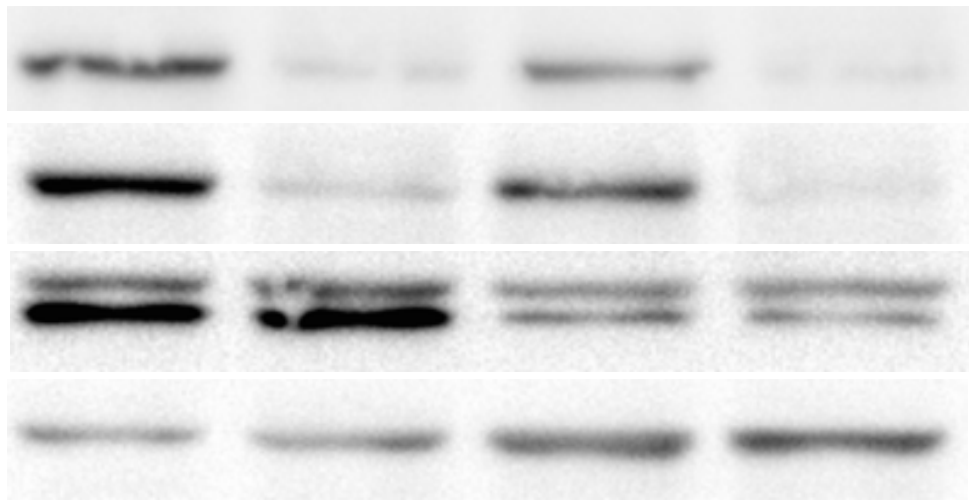

Supplement: MOESM2 [file 17662018]
