# Supplementary material for: The SMAC mimetic LCL-161 selectively targets JAK2V617F mutant cells
Source: Springer Nature journal article supplement (doi:10.1186/s40164-019-0157-6), 2020-01-02

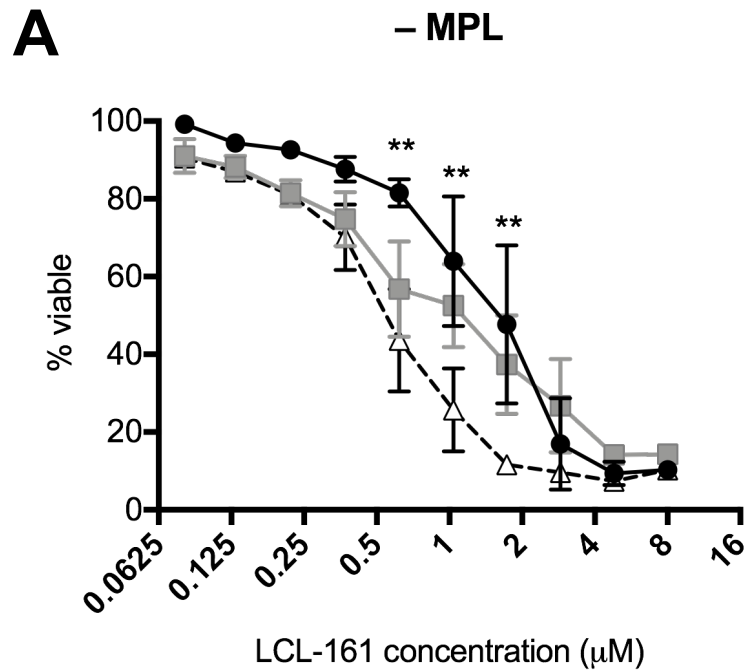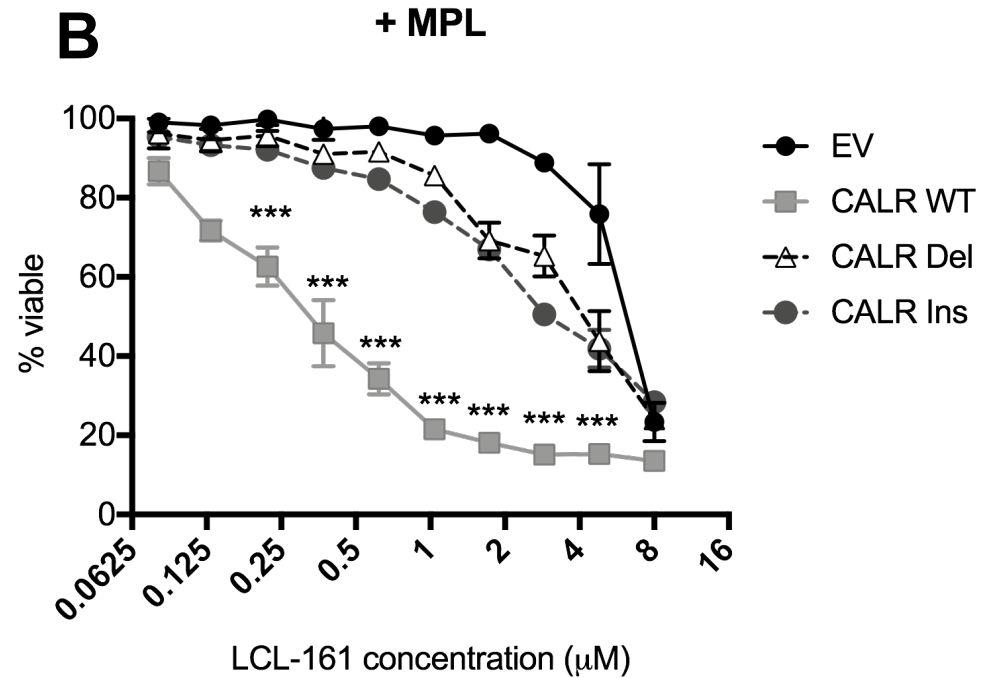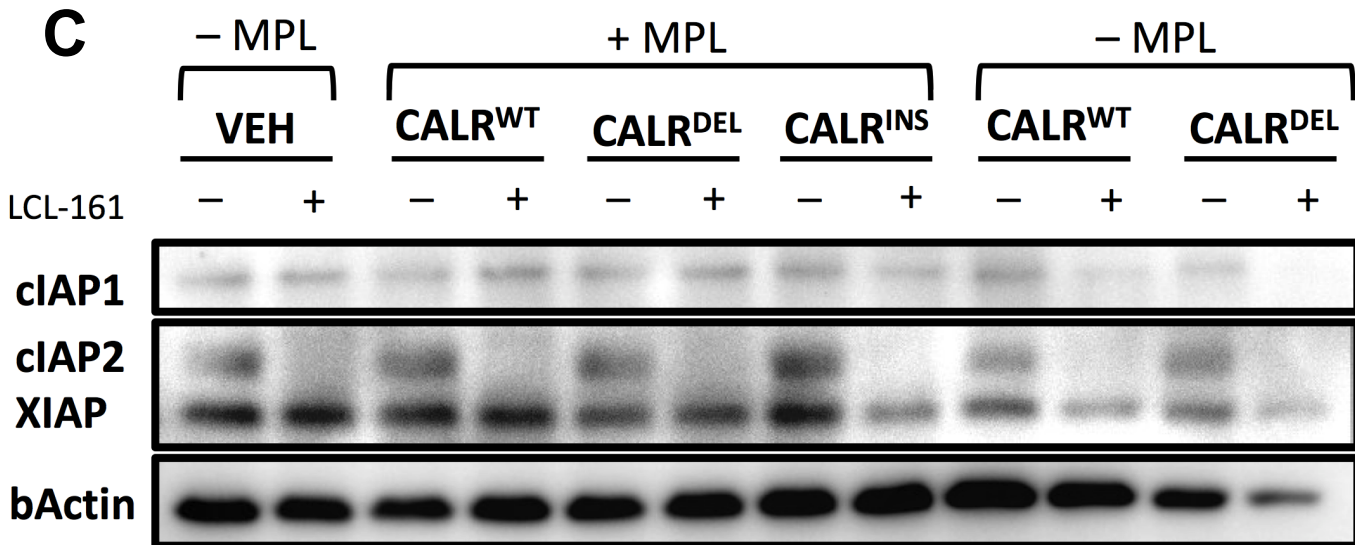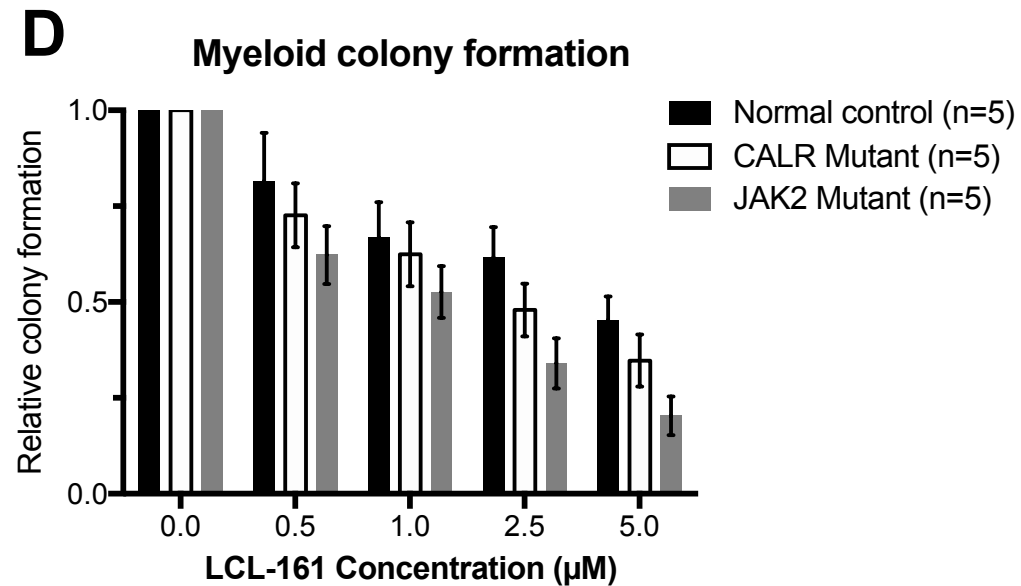

Supplement: MOESM3 [file 17662018]
